# Supplementary material for: Associations between dietary index for gut microbiota and stroke, and the mediating role of inflammation: a prospective cohort study
Source: Royal Society of Chemistry journal article supplement (doi:10.1039/d5fo01041a), 2025-01-01
Supplement: d5fo01041a1.pdf [file d5fo01041a1.pdf]

## **Associations between dietary index for gut microbiota and stroke, and the mediating role of inflammation: a prospective cohort study**

### **Contents**

|                                                                                                                                                                                    |    |
|------------------------------------------------------------------------------------------------------------------------------------------------------------------------------------|----|
| Supplementary Table 1. Characteristics of participants in dietary assessments in the UK Biobank over time. ....                                                                    | 3  |
| Supplementary Table 2. The components and field IDs of DI-GM in the UK Biobank.....                                                                                                | 5  |
| Supplementary Table 3. Definitions of inflammatory biomarkers and INFLA-score. ....                                                                                                | 7  |
| Supplementary Table 4. The numbers (percentages) of participants with missing covariates in the analysis.....                                                                      | 8  |
| Supplementary Table 5. The association of DI-GM with stroke risk after including participants with only one diet questionnaire (N = 207,666).....                                  | 9  |
| Supplementary Table 6. The association of DI-GM with stroke risk after excluding participants with unreasonable energy intake and atypical diets (N = 102,005). ....               | 10 |
| Supplementary Table 7. The association of DI-GM with stroke risk after excluding participants who experienced a stroke within the first two years of follow-up (N = 124,515). .... | 11 |
| Supplementary Table 8. The association of DI-GM with stroke risk after excluding participants with AF, atherosclerosis, dementia, and depression at baseline (N = 112,442).....    | 12 |
| Supplementary Table 9. The association of DI-GM with stroke risk after performing multiple imputation for missing covariates (N = 124,943). ....                                   | 13 |
| Supplementary Table 10. The association between DI-GM and inflammatory biomarkers. ....                                                                                            | 14 |
| Supplementary Table 11. Effect of baseline DI-GM on longitudinal changes in inflammatory                                                                                           |    |

|                                                                                                                                                                   |    |
|-------------------------------------------------------------------------------------------------------------------------------------------------------------------|----|
| biomarkers.....                                                                                                                                                   | 15 |
| Supplementary Table 12. The association of inflammatory biomarkers with stroke risk.....                                                                          | 16 |
| Supplementary Figure 1. Data distributions of DI-GM, BGMS and UGMS from 124,943 participants.....                                                                 | 17 |
| Supplementary Figure 2. Data distributions of the INFLA-score from 109,422 participants.....                                                                      | 18 |
| Supplementary Figure 3. Number of hemorrhagic stroke events by DI-GM score in the total population and after exclusion of missing covariates in three models..... | 19 |
| Supplementary Figure 4. Non-linear associations between DI-GM and the risk of stroke and its subtypes.....                                                        | 20 |

**Supplementary Table 1. Characteristics of participants in dietary assessments in the UK**

**Biobank over time.**

| Time                           | Characteristics                                  | Respondent     | Non-respondent |
|--------------------------------|--------------------------------------------------|----------------|----------------|
| Baseline                       | N                                                | 70,676         |                |
| Conducted in assessment center | Age (mean (SD))                                  | 56.21 (8.16)   |                |
| April 2009 to September 2010   | Sex, Male (%)                                    | 31,616 (44.73) |                |
|                                | Ethnic, White (%)                                | 65,954 (93.32) |                |
|                                | College degree or professional qualification (%) | 30,768 (43.83) |                |
|                                | TDI (mean (SD))                                  | -1.27 (2.84)   |                |
|                                | Previous or current smoker (%)                   | 30,623 (43.46) |                |
|                                | Previous or current drinker (%)                  | 67,894 (96.17) |                |
|                                | BMI, overweight (%)                              | 45,129 (64.95) |                |
|                                | Hypertension (%)                                 | 48,993 (70.18) |                |
| First Dietary Follow-up        | N                                                | 100,553        | 205,758        |
| February 2011 to April 2011    | Age (mean (SD))                                  | 56.10 (7.83)   | 55.41 (8.11)   |
| Response rate: 32.83%          | Sex, Male (%)                                    | 44,954 (44.7)  | 97,591 (47.4)  |
|                                | Ethnic, White (%)                                | 97,158 (96.6)  | 192,190 (93.4) |
|                                | College degree or professional qualification (%) | 51,297 (51.2)  | 85,076 (41.7)  |
|                                | TDI (mean (SD))                                  | -1.67 (2.84)   | -1.52 (2.94)   |
|                                | Previous or current smoker (%)                   | 43,232 (43.1)  | 91,720 (44.8)  |
|                                | Previous or current drinker (%)                  | 97,535 (97.1)  | 197,817 (96.4) |
|                                | BMI, overweight (%)                              | 60,933 (61.5)  | 137,645 (68.1) |
|                                | Hypertension (%)                                 | 67,822 (71.1)  | 139,028 (70.8) |
| Second Dietary Follow-up       | N                                                | 83,222         | 234,994        |
| June 2011 to September 2011    | Age (mean (SD))                                  | 56.24 (7.77)   | 55.51 (8.11)   |
| Response rate: 26.15%          | Sex, Male (%)                                    | 36,882 (44.3)  | 110,683 (47.1) |
|                                | Ethnic, White (%)                                | 80,498 (96.7)  | 220,416 (93.8) |
|                                | College degree or professional qualification (%) | 42,565 (51.3)  | 98,682 (42.4)  |
|                                | TDI (mean (SD))                                  | -1.65 (2.86)   | -1.55 (2.93)   |
|                                | Previous or current smoker (%)                   | 35,799 (43.1)  | 104,291 (44.6) |
|                                | Previous or current drinker (%)                  | 80,732 (97.1)  | 226,115 (96.4) |
|                                | BMI, overweight (%)                              | 50,705 (61.8)  | 155,300 (67.3) |
|                                | Hypertension (%)                                 | 56,028 (71.1)  | 158,345 (70.9) |
| Third Dietary Follow-up        | N                                                | 103,736        | 214,665        |
| October 2011 to December 2011  | Age (mean (SD))                                  | 56.17 (7.81)   | 55.48 (8.13)   |
| Response rate: 32.58%          | Sex, Male (%)                                    | 46,265 (44.6)  | 101,365 (47.2) |
|                                | Ethnic, White (%)                                | 100,172 (96.6) | 200,924 (93.6) |
|                                | College degree or professional qualification (%) | 53,685 (51.9)  | 87,647 (41.2)  |
|                                | TDI (mean (SD))                                  | -1.66 (2.85)   | -1.53 (2.94)   |
|                                | Previous or current smoker (%)                   | 44,095 (42.6)  | 96,077 (44.9)  |

|                          |                                                  |                |                |
|--------------------------|--------------------------------------------------|----------------|----------------|
|                          | Previous or current drinker (%)                  | 100,661 (97.1) | 206,366 (96.3) |
|                          | BMI, overweight (%)                              | 62,005 (60.7)  | 144,092 (68.3) |
|                          | Hypertension (%)                                 | 69,331 (70.5)  | 145,159 (71.2) |
| Fourth Dietary Follow-up | N                                                | 100,197        | 228,896        |
| April 2012 to June 2012  | Age (mean (SD))                                  | 56.26 (7.77)   | 55.53 (8.12)   |
| Response rate: 30.45%    | Sex, Male (%)                                    | 44,100 (44.0)  | 108,417 (47.4) |
|                          | Ethnic, White (%)                                | 96,792 (96.6)  | 214,713 (93.8) |
|                          | College degree or professional qualification (%) | 52,230 (52.3)  | 93,247 (41.1)  |
|                          | TDI (mean (SD))                                  | -1.65 (2.86)   | -1.55 (2.93)   |
|                          | Previous or current smoker (%)                   | 42,660 (42.7)  | 102,255 (44.9) |
|                          | Previous or current drinker (%)                  | 97,096 (97.0)  | 220,232 (96.4) |
|                          | BMI, overweight (%)                              | 59,635 (60.4)  | 153,433 (68.2) |
|                          | Hypertension (%)                                 | 66,792 (70.5)  | 154,616 (71.3) |

---

Abbreviations: N, number of participants; TDI, Townsend deprivation index; BMI, body mass index; SD, standard deviation.

**Supplementary Table 2. The components and field IDs of DI-GM in the UK Biobank.**

| Components of DI-GM           | Food items included in UK Biobank         |                                                   | Field ID |
|-------------------------------|-------------------------------------------|---------------------------------------------------|----------|
| Beneficial to gut microbiota  | Avocados <sup>#</sup>                     | —                                                 | 104100   |
|                               | Broccoli <sup>#</sup>                     | —                                                 | 104140   |
|                               | Green tea <sup>#</sup>                    | —                                                 | 100420   |
|                               | Soybean <sup>#</sup>                      | Meat substitutes - soy                            | 26137    |
|                               |                                           | Soy desserts and yogurt                           | 26086    |
|                               |                                           | Soy milk                                          | 26136    |
|                               | Fiber <sup>†</sup>                        | —                                                 | 26017    |
|                               | Coffee <sup>†</sup>                       | Coffee, caffeinated                               | 26081    |
|                               |                                           | Coffee, decaffeinated                             | 26082    |
|                               | Fermented dairy <sup>†</sup>              | Full fat yogurt                                   | 26096    |
|                               |                                           | Low fat yogurt                                    | 26102    |
|                               |                                           | High fat cheese                                   | 26099    |
|                               |                                           | Medium and low fat cheese                         | 26103    |
|                               | Whole grains <sup>†</sup>                 | Biscuit cereal                                    | 26075    |
|                               |                                           | Bran cereal                                       | 26076    |
|                               |                                           | Muesli                                            | 26105    |
|                               |                                           | Oat cereal (non sugar)                            | 26077    |
|                               |                                           | Oat cereal (sugar)                                | 26078    |
|                               |                                           | Wholemeal bread                                   | 26074    |
|                               |                                           | Wholemeal pasta, brown rice and other wholegrains | 26114    |
| Unfavorable to gut microbiota | Processed meat <sup>*</sup>               | —                                                 | 26122    |
|                               | Red meat <sup>*</sup>                     | Beef                                              | 26066    |
|                               |                                           | Lamb                                              | 26100    |
|                               |                                           | Pork                                              | 26117    |
|                               | Refined grains <sup>*</sup>               | Biscuits                                          | 26068    |
|                               |                                           | Pizza                                             | 26116    |
|                               |                                           | Samosa, pakora                                    | 26128    |
|                               |                                           | Savoury crackers                                  | 26083    |
|                               |                                           | White bread                                       | 26073    |
|                               |                                           | White pasta and rice                              | 26113    |
|                               |                                           | Grain dishes - added fat                          | 26097    |
|                               |                                           | Other bread                                       | 26072    |
|                               |                                           | Other cereal (sugar)                              | 26079    |
|                               |                                           | Savoury snacks                                    | 26134    |
|                               |                                           | Other desserts and cakes and pastries             | 26085    |
|                               | High-fat diet (% energy) <sup>&amp;</sup> | Total energy                                      | 26002    |
|                               |                                           | Total fat                                         | 26008    |

<sup>#</sup>Score 1: Consumption > sex-specific median, score 0: Otherwise;

<sup>†</sup>Score 1: Consumption  $\geq$  sex-specific median, score 0: Otherwise;

\*Score 0: Consumption  $\geq$  sex-specific median, score 1: Otherwise;

<sup>&</sup>Score 0: Consumption  $\geq$  40%, score 1: Otherwise.

Abbreviation: DI-GM, dietary index for gut microbiota.

Since the sex-specific median for avocados, broccoli, green tea and soybean in the UKB was 0, we considered it illogical to assign a score of 1 to all participants for the consumption of these foods. Therefore, for these items, participants with consumption exceeding the sex-specific median were assigned a score of 1; otherwise, the score was 0.

**Supplementary Table 3. Definitions of inflammatory biomarkers and INFLA-score.**

| Item                               | Abbreviation | Unit               | Field ID        |
|------------------------------------|--------------|--------------------|-----------------|
| Inflammatory biomarkers            |              |                    |                 |
| C-reactive protein                 | CRP          | mg/L               | 30710           |
| Neutrophil count                   | NEUT         | 10 <sup>9</sup> /L | 30140           |
| Monocyte count                     | MONO         | 10 <sup>9</sup> /L | 30130           |
| White blood cell (leukocyte) count | WBC          | 10 <sup>9</sup> /L | 30000           |
| Platelet count                     | PLT          | 10 <sup>9</sup> /L | 30080           |
| Lymphocyte count                   | LYMPH        | 10 <sup>9</sup> /L | 30120           |
| Neutrophil-to-lymphocyte ratio     | NLR          | /                  | 30140 and 30120 |
| INFLA-score                        |              |                    |                 |
| C-reactive protein                 | CRP          | mg/L               | 30710           |
| White blood cell (leukocyte) count | WBC          | 10 <sup>9</sup> /L | 30000           |
| Platelet count                     | PLT          | 10 <sup>9</sup> /L | 30080           |
| Neutrophil-to-lymphocyte ratio     | NLR          | /                  | 30140 and 30120 |

Abbreviation: INFLA, low-grade chronic inflammation score.

**Supplementary Table 4. The numbers (percentages) of participants with missing covariates in the analysis.**

| Covariates                       | N      | %     |
|----------------------------------|--------|-------|
| Education                        | 387    | 0.31  |
| Townsend deprivation index (TDI) | 147    | 0.12  |
| Smoking status                   | 266    | 0.21  |
| Alcohol status                   | 89     | 0.07  |
| Body mass index (BMI)            | 268    | 0.21  |
| Systolic Blood Pressure          | 5,656  | 4.53  |
| Diastolic Blood Pressure         | 5,652  | 4.52  |
| Family history of stroke         | 1,993  | 1.60  |
| Physical activity                | 25,996 | 20.81 |

Abbreviations: N, number of participants.



**Supplementary Table 5. The association of DI-GM with stroke risk after including participants with only one diet questionnaire (N = 207,666).**

| Predictor   | Stroke           |          | Ischemic stroke  |          | Hemorrhage stroke |         |
|-------------|------------------|----------|------------------|----------|-------------------|---------|
|             | HR [95% CI]      | p-value  | HR [95% CI]      | p-value  | HR [95% CI]       | p-value |
| DI-GM       | 0.97 [0.95-0.98] | 8.32E-06 | 0.96 [0.94-0.98] | 6.75E-05 | 0.98 [0.95-1.02]  | 0.409   |
| DI-GM group |                  |          |                  |          |                   |         |
| 0-3         | Reference        |          | Reference        |          | Reference         |         |
| 4           | 0.92 [0.86-1.00] | 0.045    | 0.98 [0.88-1.10] | 0.780    | 0.76 [0.61-0.95]  | 0.014   |
| 5           | 0.89 [0.83-0.96] | 0.003    | 0.88 [0.78-0.98] | 0.026    | 0.89 [0.73-1.09]  | 0.259   |
| ≥6          | 0.86 [0.80-0.92] | 1.12E-05 | 0.84 [0.76-0.93] | 8.85E-04 | 0.94 [0.78-1.12]  | 0.465   |
| Trend test  |                  | 1.22E-05 |                  | 1.22E-04 |                   | 0.888   |
| BGMS        | 0.93 [0.91-0.95] | 8.11E-15 | 0.91 [0.89-0.94] | 5.00E-10 | 0.96 [0.91-1.00]  | 0.072   |
| UGMS        | 1.01 [0.97-1.05] | 0.626    | 1.03 [0.99-1.08] | 0.112    | 1.04 [0.97-1.12]  | 0.279   |

Multivariable Cox proportional hazard model was used to examine the associations of DI-GM with stroke risk, adjusting for potential confounders including age, sex, ethnicity, TDI, education level, smoking status, alcohol consumption, energy intake, BMI, blood pressure, diabetes and family history of stroke.

Abbreviations: DI-GM, dietary index for gut microbiota; BGMS, beneficial to gut microbiota score; UGMS, unfavorable to gut microbiota score; TDI, Townsend Deprivation Index; BMI, body mass index; HR, hazard ratio; CI, confidence interval; N, number of participants.

**Supplementary Table 6. The association of DI-GM with stroke risk after excluding participants with unreasonable energy intake and atypical diets (N = 102,005).**

| Predictor   | Stroke           |          | Ischemic stroke  |          | Hemorrhage stroke |         |
|-------------|------------------|----------|------------------|----------|-------------------|---------|
|             | HR [95% CI]      | p-value  | HR [95% CI]      | p-value  | HR [95% CI]       | p-value |
| DI-GM       | 0.97 [0.95-0.99] | 0.006    | 0.96 [0.93-0.99] | 0.016    | 0.97 [0.92-1.02]  | 0.204   |
| DI-GM group |                  |          |                  |          |                   |         |
| 0-3         | Reference        |          | Reference        |          | Reference         |         |
| 4           | 0.89 [0.80-1.00] | 0.056    | 0.94 [0.79-1.12] | 0.501    | 0.83 [0.61-1.13]  | 0.241   |
| 5           | 0.88 [0.79-0.99] | 0.026    | 0.88 [0.75-1.05] | 0.153    | 0.88 [0.65-1.18]  | 0.377   |
| ≥6          | 0.85 [0.77-0.94] | 1.02E-03 | 0.84 [0.73-0.98] | 0.026    | 0.87 [0.67-1.13]  | 0.302   |
| Trend test  |                  | 0.002    |                  | 0.018    |                   | 0.454   |
| BGMS        | 0.94 [0.91-0.97] | 6.27E-06 | 0.93 [0.89-0.97] | 3.30E-04 | 0.93 [0.86-1.00]  | 0.035   |
| UGMS        | 1.03 [0.99-1.07] | 0.162    | 1.02 [0.96-1.09] | 0.481    | 1.04 [0.93-1.16]  | 0.494   |

Multivariable Cox proportional hazard model was used to examine the associations of DI-GM with stroke risk, adjusting for potential confounders including age, sex, ethnicity, TDI, education level, smoking status, alcohol consumption, energy intake, BMI, blood pressure, diabetes and family history of stroke.

Abbreviations: DI-GM, dietary index for gut microbiota; BGMS, beneficial to gut microbiota score; UGMS, unfavorable to gut microbiota score; TDI, Townsend Deprivation Index; BMI, body mass index; HR, hazard ratio; CI, confidence interval; N, number of participants.

**Supplementary Table 7. The association of DI-GM with stroke risk after excluding participants who experienced a stroke within the first two years of follow-up (N = 124,515).**

| Predictor   | Stroke           |          | Ischemic stroke  |          | Hemorrhage stroke |         |
|-------------|------------------|----------|------------------|----------|-------------------|---------|
|             | HR [95% CI]      | p-value  | HR [95% CI]      | p-value  | HR [95% CI]       | p-value |
| DI-GM       | 0.98 [0.96-1.00] | 0.014    | 0.96 [0.93-0.99] | 0.018    | 0.98 [0.93-1.04]  | 0.524   |
| DI-GM group |                  |          |                  |          |                   |         |
| 0-3         | Reference        |          | Reference        |          | Reference         |         |
| 4           | 0.88 [0.79-0.99] | 0.029    | 1.02 [0.86-1.21] | 0.800    | 0.87 [0.64-1.18]  | 0.370   |
| 5           | 0.86 [0.77-0.96] | 0.008    | 0.91 [0.77-1.08] | 0.263    | 0.92 [0.69-1.24]  | 0.584   |
| ≥6          | 0.88 [0.80-0.97] | 0.009    | 0.90 [0.77-1.04] | 0.148    | 0.95 [0.73-1.23]  | 0.694   |
| Trend test  |                  | 0.022    |                  | 0.065    |                   | 0.906   |
| BGMS        | 0.95 [0.92-0.97] | 5.22E-05 | 0.93 [0.90-0.97] | 8.64E-04 | 0.95 [0.88-1.02]  | 0.122   |
| UGMS        | 1.03 [0.99-1.07] | 0.177    | 1.01 [0.95-1.08] | 0.701    | 1.06 [0.96-1.18]  | 0.261   |

Multivariable Cox proportional hazard model was used to examine the associations of DI-GM with stroke risk, adjusting for potential confounders including age, sex, ethnicity, TDI, education level, smoking status, alcohol consumption, energy intake, BMI, blood pressure, diabetes and family history of stroke.

Abbreviations: DI-GM, dietary index for gut microbiota; BGMS, beneficial to gut microbiota score; UGMS, unfavorable to gut microbiota score; TDI, Townsend Deprivation Index; BMI, body mass index; HR, hazard ratio; CI, confidence interval; N, number of participants.

**Supplementary Table 8. The association of DI-GM with stroke risk after excluding participants with AF, atherosclerosis, dementia, and depression at baseline (N = 112,442).**

| Predictor   | Stroke           |          | Ischemic stroke  |          | Hemorrhage stroke |         |
|-------------|------------------|----------|------------------|----------|-------------------|---------|
|             | HR [95% CI]      | p-value  | HR [95% CI]      | p-value  | HR [95% CI]       | p-value |
| DI-GM       | 0.97 [0.95-0.99] | 7.33E-03 | 0.97 [0.94-1.00] | 0.027    | 0.96 [0.91-1.01]  | 0.142   |
| DI-GM group |                  |          |                  |          |                   |         |
| 0-3         | Reference        |          | Reference        |          | Reference         |         |
| 4           | 0.85 [0.76-0.95] | 0.005    | 0.97 [0.82-1.15] | 0.700    | 0.76 [0.56-1.03]  | 0.076   |
| 5           | 0.85 [0.76-0.95] | 4.66E-03 | 0.88 [0.74-1.04] | 0.143    | 0.80 [0.60-1.07]  | 0.139   |
| ≥6          | 0.85 [0.77-0.93] | 8.90E-04 | 0.87 [0.75-1.01] | 0.075    | 0.82 [0.64-1.06]  | 0.124   |
| Trend test  |                  | 4.76E-03 |                  | 0.048    |                   | 0.254   |
| BGMS        | 0.95 [0.93-0.98] | 1.62E-04 | 0.94 [0.91-0.98] | 4.79E-03 | 0.93 [0.87-1.00]  | 0.043   |
| UGMS        | 1.01 [0.97-1.05] | 0.656    | 1.00 [0.94-1.06] | 0.930    | 1.01 [0.91-1.13]  | 0.855   |

Multivariable Cox proportional hazard model was used to examine the associations of DI-GM with stroke risk, adjusting for potential confounders including age, sex, ethnicity, TDI, education level, smoking status, alcohol consumption, energy intake, BMI, blood pressure, diabetes and family history of stroke.

Abbreviations: DI-GM, dietary index for gut microbiota; BGMS, beneficial to gut microbiota score; UGMS, unfavorable to gut microbiota score; AF, atrial fibrillation; TDI, Townsend Deprivation Index; BMI, body mass index; HR, hazard ratio; CI, confidence interval; N, number of participants.

**Supplementary Table 9. The association of DI-GM with stroke risk after performing multiple imputation for missing covariates (N = 124,943).**

| Predictor   | Stroke           |          | Ischemic stroke  |          | Hemorrhage stroke |         |
|-------------|------------------|----------|------------------|----------|-------------------|---------|
|             | HR [95% CI]      | p-value  | HR [95% CI]      | p-value  | HR [95% CI]       | p-value |
| DI-GM       | 0.97 [0.95-0.99] | 4.01E-04 | 0.96 [0.94-0.99] | 0.010    | 0.96 [0.91-1.00]  | 0.076   |
| DI-GM group |                  |          |                  |          |                   |         |
| 0-3         | Reference        |          | Reference        |          | Reference         |         |
| 4           | 0.86 [0.78-0.95] | 0.004    | 0.97 [0.83-1.13] | 0.680    | 0.75 [0.57-0.99]  | 0.042   |
| 5           | 0.85 [0.77-0.94] | 1.04E-03 | 0.89 [0.76-1.03] | 0.120    | 0.84 [0.65-1.08]  | 0.176   |
| ≥6          | 0.84 [0.77-0.92] | 9.75E-05 | 0.87 [0.76-0.99] | 0.038    | 0.82 [0.66-1.03]  | 0.094   |
| Trend test  |                  | 4.69E-04 |                  | 0.021    |                   | 0.239   |
| BGMS        | 0.94 [0.92-0.96] | 9.18E-07 | 0.94 [0.90-0.97] | 4.89E-04 | 0.92 [0.87-0.98]  | 0.011   |
| UGMS        | 1.01 [0.97-1.05] | 0.626    | 1.01 [0.95-1.06] | 0.833    | 1.02 [0.92-1.12]  | 0.730   |

Multivariable Cox proportional hazard model was used to examine the associations of DI-GM with stroke risk, adjusting for potential confounders including age, sex, ethnicity, TDI, education level, smoking status, alcohol consumption, energy intake, BMI, blood pressure, diabetes, family history of stroke, atrial fibrillation, atherosclerosis, dementia, depression and physical activity.

Abbreviations: DI-GM, dietary index for gut microbiota; BGMS, beneficial to gut microbiota score; UGMS, unfavorable to gut microbiota score; TDI, Townsend Deprivation Index; BMI, body mass index; HR, hazard ratio; CI, confidence interval; N, number of participants.

**Supplementary Table 10. The association between DI-GM and inflammatory biomarkers.**

| Name                               | Beta   | p-value   | FDR       |
|------------------------------------|--------|-----------|-----------|
| C-reactive protein                 | -0.040 | 4.33E-141 | 1.73E-140 |
| Neutrophil count                   | -0.030 | 7.28E-67  | 1.46E-66  |
| Monocyte count                     | -0.019 | 1.65E-30  | 2.43E-30  |
| White blood cell (leukocyte) count | -0.032 | 1.45E-75  | 3.87E-75  |
| Platelet count                     | -0.020 | 1.82E-30  | 2.43E-30  |
| Lymphocyte count                   | -0.015 | 3.70E-18  | 4.23E-18  |
| Neutrophil-to-lymphocyte ratio     | -0.013 | 1.45E-13  | 1.45E-13  |
| INFLA-score                        | -0.258 | 2.04E-145 | 1.63E-144 |

Multiple linear regression was used to examine the associations of baseline DI-GM with baseline inflammatory biomarkers, adjusting for potential confounders including age, sex, ethnicity, TDI, education level, smoking status, alcohol consumption, energy intake, BMI, blood pressure, diabetes and family history of stroke.

Abbreviations: DI-GM, dietary index for gut microbiota; INFLA, low-grade chronic inflammation score; TDI, Townsend Deprivation Index; BMI, body mass index; FDR, false discovery rate.

**Supplementary Table 11. Effect of baseline DI-GM on longitudinal changes in inflammatory biomarkers.**

| Name                               | Beta   | p-value  | FDR      |
|------------------------------------|--------|----------|----------|
| C-reactive protein                 | -0.025 | 1.32E-05 | 2.89E-05 |
| Neutrophil count                   | -0.027 | 3.40E-06 | 1.36E-05 |
| Monocyte count                     | -0.016 | 0.005    | 0.006    |
| White blood cell (leukocyte) count | -0.031 | 9.33E-08 | 7.46E-07 |
| Platelet count                     | -0.011 | 0.057    | 0.065    |
| Lymphocyte count                   | -0.019 | 1.18E-03 | 0.002    |
| Neutrophil-to-lymphocyte ratio     | -0.006 | 0.265    | 0.265    |
| INFLA-score                        | -0.025 | 1.44E-05 | 2.89E-05 |

Multiple linear regression was used to examine the associations of baseline DI-GM with the rate of longitudinal changes in inflammatory biomarkers, adjusting for potential confounders including age, sex, ethnicity, TDI, education level, smoking status, alcohol consumption, energy intake, BMI, blood pressure, diabetes, and family history of stroke. The rate of longitudinal changes in inflammatory biomarkers was calculated using linear mixed-effects models.

Abbreviations: DI-GM, dietary index for gut microbiota; INFLA, low-grade chronic inflammation score; TDI, Townsend Deprivation Index; BMI, body mass index; FDR, false discovery rate.

**Supplementary Table 12. The association of inflammatory biomarkers with stroke risk.**

| Name                               | HR   | 95% CI    | p-value | FDR    |
|------------------------------------|------|-----------|---------|--------|
| C-reactive protein                 | 1.08 | 1.04-1.12 | 0.0001  | 0.0010 |
| Neutrophil count                   | 1.06 | 1.02-1.10 | 0.0052  | 0.0084 |
| Monocyte count                     | 1.07 | 1.03-1.11 | 0.0004  | 0.0017 |
| White blood cell (leukocyte) count | 1.05 | 1.01-1.09 | 0.0173  | 0.0231 |
| Platelet count                     | 0.97 | 0.94-1.01 | 0.1499  | 0.1713 |
| Lymphocyte count                   | 0.98 | 0.95-1.02 | 0.3264  | 0.3264 |
| Neutrophil-to-lymphocyte ratio     | 1.06 | 1.03-1.10 | 0.0008  | 0.0017 |
| INFLA-score                        | 1.01 | 1.01-1.02 | 0.0007  | 0.0017 |

Multivariable Cox proportional hazard model was used to examine the associations of inflammatory biomarkers with stroke risk, adjusting for potential confounders including age, sex, ethnicity, TDI, education level, smoking status, alcohol consumption, energy intake, BMI, blood pressure, diabetes and family history of stroke.

Abbreviations: INFLA, low-grade chronic inflammation score; TDI, Townsend Deprivation Index; BMI, body mass index; HR, hazard ratio; CI, confidence interval; FDR, false discovery rate.



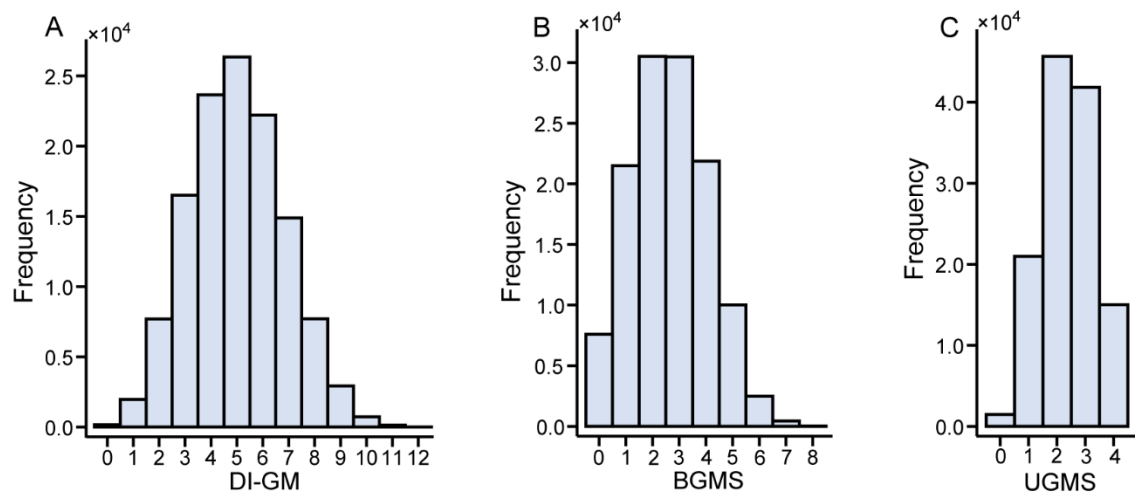

**Supplementary Figure 1. Data distributions of DI-GM, BGMS and UGMS from 124,943 participants.**

Abbreviations: DI-GM, dietary index for gut microbiota; BGMS, beneficial to gut microbiota score; UGMS, unfavorable to gut microbiota score.

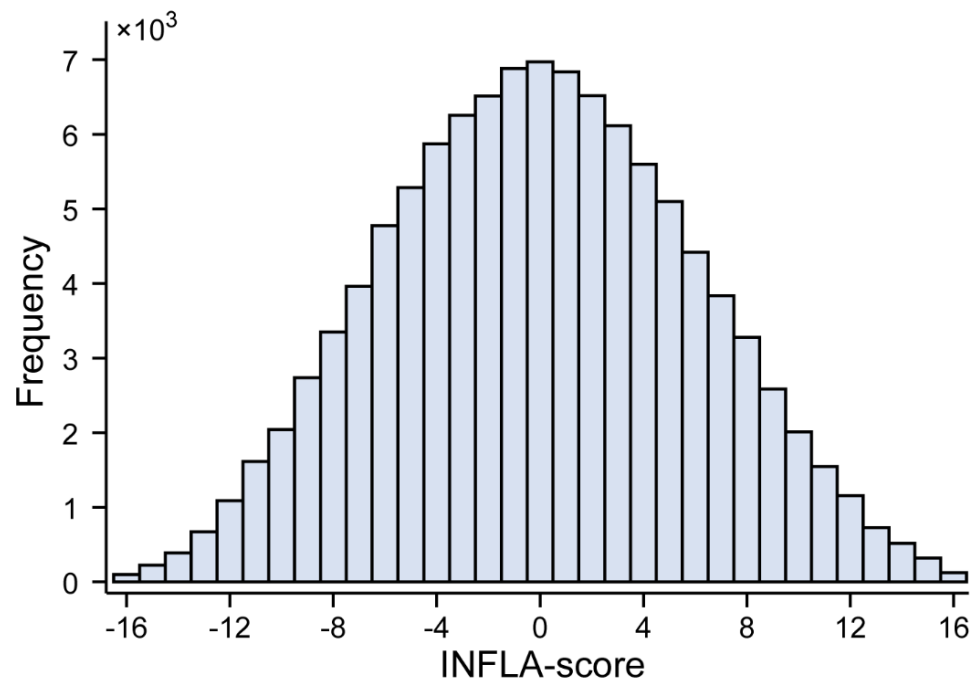

**Supplementary Figure 2. Data distributions of the INFLA-score from 109,422 participants.**

Abbreviations: INFLA, low-grade chronic inflammation score.

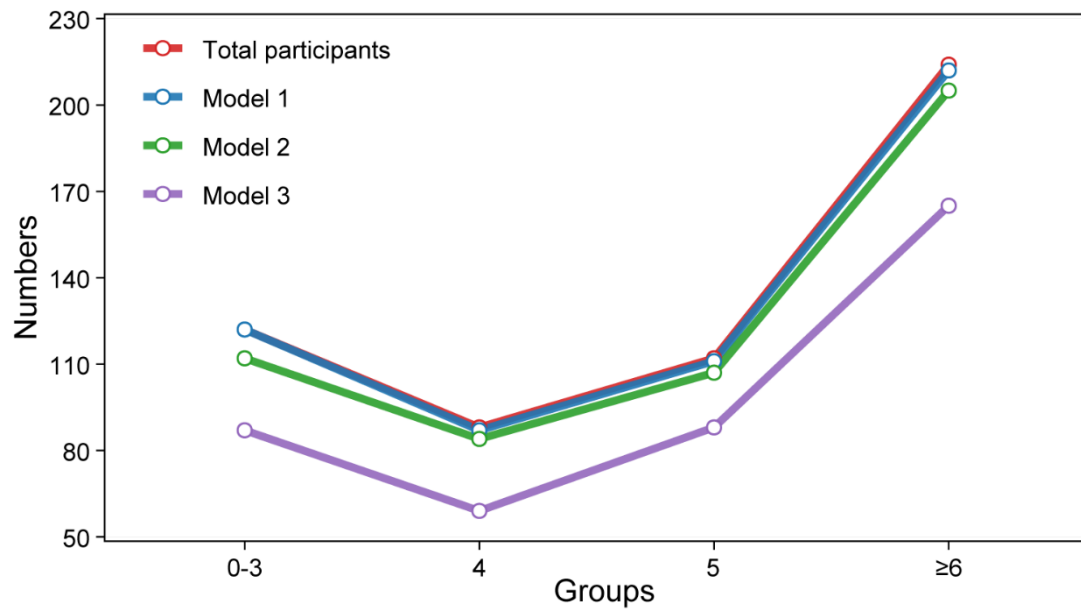

**Supplementary Figure 3. Number of hemorrhagic stroke events by DI-GM score in the total population and after exclusion of missing covariates in three models.**

Abbreviations: DI-GM, dietary index for gut microbiota.

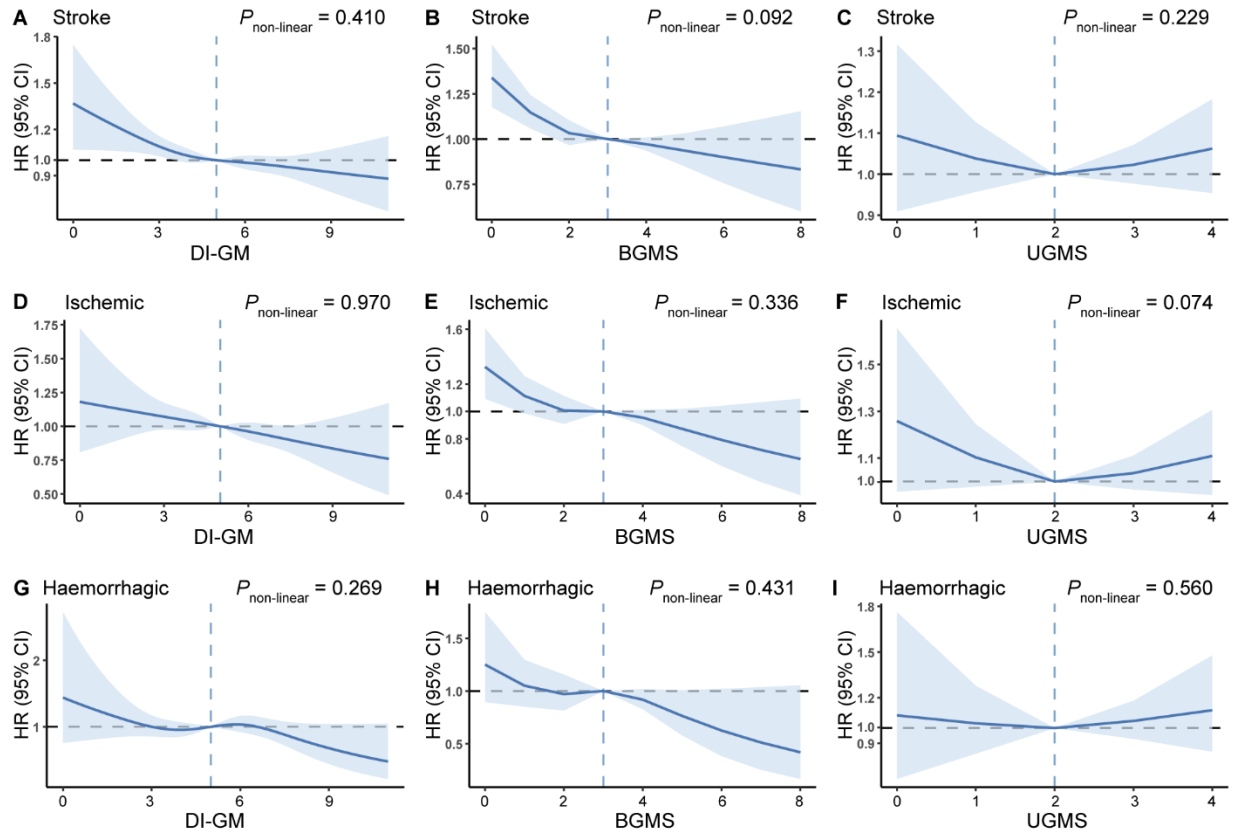

**Supplementary Figure 4. Non-linear associations between DI-GM and the risk of stroke and its subtypes.**

Two-sided Cox regression models were adjusted for age, sex, ethnicity, TDI, education level, smoking status, alcohol consumption, energy intake, BMI, blood pressure, diabetes and family history of stroke. Solid lines (center of the error bands) indicate HRs, and shading indicate 95% CIs. Blue dashed line indicates the reference point.

Abbreviations: DI-GM, dietary index for gut microbiota; BGMS, beneficial to gut microbiota score; UGMS, unfavorable to gut microbiota score; TDI, Townsend Deprivation Index; BMI, body mass index; HR, hazard ratio; CI, confidence interval.
